# Supplementary material
Source: Springer Nature journal article supplement (https://www.springermedizin.de/resource/supplementary/12916_2013_981_MOESM5_ESM.pdf/9598756)
Supplement: MOESM5 [file 9598756]

**Supplementary Table 5:** Biological pathways including genes that exhibit differential up-regulated mRNA expression ( $q < 0.05$ ) after palmitate treatment in human pancreatic islets.

| Pathway (total number of genes in the pathway)   | Observed number of genes                                                                                                                                                                                                                   | Expected number of genes | Ratio Observed/expected | Raw P-value            | Adjusted P-value       |
|--------------------------------------------------|--------------------------------------------------------------------------------------------------------------------------------------------------------------------------------------------------------------------------------------------|--------------------------|-------------------------|------------------------|------------------------|
| Ribosome (81)                                    | 33                                                                                                                                                                                                                                         | 2.55                     | 12.96                   | $1.43 \times 10^{-28}$ | $1.34 \times 10^{-26}$ |
| Aminoacyl-tRNA biosynthesis (40)                 | 7                                                                                                                                                                                                                                          | 1.26                     | 5.57                    | 0.0002                 | 0.0094                 |
| PPAR signaling pathway (67)                      | 8                                                                                                                                                                                                                                          | 2.11                     | 3.80                    | 0.0012                 | 0.0305                 |
| Amino sugar and nucleotide sugar metabolism (43) | 6                                                                                                                                                                                                                                          | 1.35                     | 4.44                    | 0.0021                 | 0.0329                 |
| <b>Pathway</b>                                   | <b>Observed genes</b>                                                                                                                                                                                                                      |                          |                         |                        |                        |
| Ribosome                                         | <i>RPS20, RPS8, RPS2, RPS5, RPL30, RPL11, RPS17, RPL18, RPL10, RPL17, RPS11, RPL27, RPS18, RPL29, RPL35, RPS25, RPL36AL, RPS10, RPL38, RPL8, RPL41, RPS27, RPL18A, RPL10A, RPS9, RPLP0, RPL35A, RPL12, RPS15A, RPS7, RPS19, RPL24, FAU</i> |                          |                         |                        |                        |
| Aminoacyl-tRNA biosynthesis                      | <i>CARS, MARS, GARS, IARS, YARS, AARS, WARS</i>                                                                                                                                                                                            |                          |                         |                        |                        |
| PPAR signaling pathway                           | <i>FABP3, FADS2, SCD, ACSL1, SLC27A2, ANGPTL4, UBC, PCK1</i>                                                                                                                                                                               |                          |                         |                        |                        |
| Amino sugar and nucleotide sugar metabolism      | <i>GMPPB, NANS, PMM2, HEXA, NAGK, PGM3</i>                                                                                                                                                                                                 |                          |                         |                        |                        |
